# Supplementary material for: Light-dependent signal transduction in the marine diatom Phaeodactylum tricornutum
Source: PubMed Central journal article supplement — Proc Natl Acad Sci U S A. 2023 Mar 10;120(11):e2216286120. doi: 10.1073/pnas.2216286120 (PMC10089185; doi:10.1073/pnas.2216286120), 2023-03-10
Supplement: pnas.2216286120.sapp.pdf [file pnas.2216286120.sapp.pdf]

1 **Light-dependent signal transduction in the marine diatom**  
2 ***Phaeodactylum tricornutum***

3

4 Ananya Agarwal<sup>1,2</sup>, Orly Levitan<sup>1,2</sup>, Helena Cruz de Carvalho<sup>3,4</sup> & Paul G. Falkowski<sup>1,5</sup>

5

6 <sup>1</sup>*Environmental Biophysics and Molecular Ecology Program, Dept. of Marine and Coastal Sciences,*  
7 *Rutgers University, New Brunswick, NJ 08901*

8 <sup>2</sup>*Department of Biochemistry and Microbiology, Rutgers University, New Brunswick, NJ 08901*

9 <sup>3</sup>*Institut de Biologie de l'ENS (IBENS), Ecole normale supérieure, CNRS, Inserm, Université PSL, 75005*  
10 *Paris, France*

11 <sup>4</sup>*Faculté des Sciences et Technologie, Université Paris Est-Créteil (UPEC), 94000 Créteil, France*

12 <sup>5</sup>*Department of Earth and Planetary Sciences, Rutgers University, Piscataway, NJ 08854*

13

14 Corresponding author

15 Paul G. Falkowski

16 Email: falko@marine.rutgers.edu

17 Tel: +1(848)932-6665

18

19

20

21 **Data availability**

22 DESeq's output for all 12,089 genes of the transcriptome is available at the NCBI GEO  
23 Accession # GSE133301

24

25 **Supporting Information:**

26 Additional supporting information may be found in the online version of this article.

27

28 **Supplemental S1: Figures & Tables**

29 **Plasmid Map S1** Plasmid map of the RNAi transformant vector used in this study

30 **Figure S1** Confocal laser microscopy images of low light acclimated Wild Type (WT)  
31 *P.tricornutum* and the PTP-33 transformant strain.

32 **Figure S2** Fluorescent microscopic images of transformant line PTP-33 acclimated to low  
33 light growth conditions.

34 **Figure S3** Relative expression levels (RT-qPCR) of mRNA Phatr3\_J43123 and its cognate  
35 Natural Anti-sense Transcript (NAT).

36 **Table S1** Differential expression heat map of Light Harvesting Complex (LHC) genes,

37 **Table S2** Differential expression heat map of Nuclear photosynthetic electron transport  
38 components and Photoreceptor genes,

39 **Table S3** Presence of Phatr3\_J50052 (LSK) in transcriptome studies of *P.tricornutum*  
40 grown under various environmental conditions

41 **Table S4** Primers designed to inserting antisense constructs into pKS plasmid using Gibson  
42 Assembly and RT-qPCR

43

44 **Supplemental S2: Dataset 1**

45 Analyzed data of transcriptome of wild-type *Phaeodactylum tricornutum* cells fully  
46 acclimated to low light intensity of 20  $\mu\text{mols photons m}^{-2}\text{s}^{-1}$  (LL) as compared to high  
47 light intensity of 940  $\mu\text{mols photons m}^{-2}\text{s}^{-1}$  (HL).

48

## 49 Supplemental Materials and Methods

50

51

### 52 *Genetic Transformation and Selection of Transformants*

53 Five  $\mu\text{g}$  pKS-ShBle-GOI-FA vector was coated onto M17 tungsten particles (1.1  $\mu\text{m}$ )  
54 according to the manufacturer's instructions (Bio-Rad). Approximately  $5 \times 10^7$  WT *P.*  
55 *tricornutum* cells were plated on 1% agar plates (50% F/2) and incubated for one day before  
56 the transformation. The cells were bombarded with the DNA-coated M17 particles at 1,550  
57 psi (52) using a PDS-1000/ He Particle Delivery System (Bio-Rad, CA). The plates were  
58 incubated at 100  $\mu\text{mol photons m}^{-2}\text{s}^{-1}$  constant illumination at 18 °C for 48 hours to recover.  
59 Cells were then re-plated onto selective 1% agar plates (50% F/2) with 100  $\mu\text{g/mL}$  Zeocin.  
60 Plates were incubated at 40  $\mu\text{mol photons m}^{-2}\text{s}^{-1}$  for three-to-four weeks to enable the  
61 transformed clones to grow. Single independent transformation events of each plasmid into  
62 WT yielded 40-80 colonies each. To screen for putative knockdown strains, each culture  
63 was propagated in liquid F/2 supplemented with Zeocin and then split into two cultures –  
64 one grown under constant high light (HL) conditions of  $\sim 800\text{-}950 \mu\text{mol photons m}^{-2}\text{s}^{-1}$  and  
65 one under constant low light (LL) conditions of  $15\text{-}25 \mu\text{mol photons m}^{-2}\text{s}^{-1}$ . Of the 638  
66 transformants isolated, the five strains that exhibited the most abnormal light acclimating  
67 phenotypes to either/both HL and LL were chosen for additional studies.

68

### 69 *Total cellular RNA Extraction, Sequencing and Analysis*

70 Samples for RNA-Seq were harvested and extracted from triplicate sets of cultures  
71 acclimated to 20 and 940  $\mu\text{mol photons m}^{-2}\text{s}^{-1}$  using TRIzol-Chloroform protocol (53)  
72 followed by removal of DNA contamination using TURBO DNA-free kit (AM1907;  
73 ThermoFisher Scientific, MA), and cleaning with an RNEasy MinElute Kit (74204;  
74 Qiagen, Germany). Integrity of RNA was verified by Polyacrylamide Gel Electrophoresis  
75 (54) with reagents treated with DEPC (D5758; Sigma-Aldrich, MO: according to  
76 manufacturer's instructions) to eliminate RNase activity.

77 TruSeq RNA Library Prep Kit v2 (Illumina, CA) was used to prepare mRNA  
78 libraries for each of the six samples according to the manufacturer's instructions. The 250  
79 bp single-indexed libraries were multiplexed and sequenced on an Illumina MiSeq  
80 platform. The raw reads were trimmed for adaptor and low-quality sequences and then  
81 aligned to *P. tricornutum* version 3.0 which is the reannotation of 12,089 filtered gene  
82 models. After aligning the raw data to *P. tricornutum*'s version 3.0 set 12,089 filtered gene  
83 models (protists.ensembl.org) files were filtered to retrieve uniquely aligned reads with no  
84 more than three mismatches. Gene counts (unique aligned reads per gene) were used for  
85 differential expression (DE) analysis carried out using the DESeq R/Bioconductor  
86 package, which infers DE based on the negative binomial distribution. For this analysis,  
87 we used a cutoff of 5% to control for false detection rate (false positives) and considered  
88 only genes that had a  $\log_2$  -fold change  $\geq \pm 2$ , and a false detection rate  $< 0.05$  to be DE.  
89 DESeq's output for all 12,089 genes was submitted to the National Center for  
90 Biotechnology Information (NCBI) Gene Expression Omnibus under accession no.  
91 GSE133301.

92

93 *Quantification of target gene mRNA copies using Quantitative Real-time PCR (RT-qPCR)*

94 Samples for RT-qPCR were pelleted by centrifuging  $6 \times 10^7$  cells for 5 min at 6,500  
95  $\times g$  at 4 °C. The samples were frozen in liquid N<sub>2</sub> and stored at -80 °C. Total RNA was  
96 extracted using TRIzol™ Reagent (ThermoFisher Scientific; MA), followed by cleaning  
97 with an RNEasy MinElute Kit (Qiagen, Germany). DNA contamination was removed  
98 using Ambion Turbo DNase (Life Technologies, CA). Samples were then run on an  
99 RNase-free polyacrylamide Gel to confirm RNA integrity. Total RNA quantification and  
100 quality assessment were made spectrophotometrically on a DS-11 FX+ Series  
101 Spectrophotometer/ Fluorometer (DS-11 FX, DeNovix Inc.; DE). Double stranded cDNA  
102 was generated using random primers with a High-Capacity cDNA Reverse Transcription  
103 Kit (ThermoFisher Scientific; MA) and directly used as the template for qPCR. Primers for  
104 target genes (Table S4) were designed with Primer Express™ Software v3.0.1  
105 (ThermoFisher Scientific; MA). The PCR reaction was performed using the Applied  
106 Biosystems Power SYBR® Green Master Mix (Life Technologies, CA) on a QuantStudio3  
107 (Applied Biosystems, CA). A serial dilution of five orders of magnitude of WT genomic  
108 DNA was used to plot a standard curve for copy number calculation with each primer pair.  
109 All standard curves had an  $R^2 > 0.94$ .

110 Strand-specific cDNA synthesis was carried out as above but with target specific  
111 primers (Table S4) also designed with Primer Express. This qPCR reaction was carried out  
112 using primer pairs from above with the Applied Biosystems PowerUP™ SYBR® Green  
113 Master Mix (Thermo Fisher Scientific; MA) for its increased sensitivity. At least three  
114 technical, as well as biological replicates were performed for each observation, and  
115 statistical significance was defined as  $p < 0.05$ .

116

### 117 *Analytical Methods*

118 Cell densities were determined using a Beckman Multisizer™ 3 Coulter Counter®  
119 (Beckman Coulter Life Sciences, IN) as well as a Guava® easyCyte 12HT Sampling Flow  
120 Cytometer (EMD Millipore Sigma, MA). Relative chlorophyll fluorescence data, obtained  
121 from the Guava, were used for high throughput screening. Based on significantly variable  
122 LL/HL ratios of Chl *a* /cell, the five most interesting transformants were analyzed.

123 Chlorophyll *a* content per cell (Chl *a*) was measured spectrophotometrically on a  
124 Cary 60 UV-Vis Spectrophotometer (Agilent Technologies, CA) from cells collected on  
125 GF/F filters (Whatman plc., United Kingdom) and extracted in 90% acetone (55) in a  
126 FastPrep-24™ using Lysis Matrix C with modifications to manufacturer's instructions (MP  
127 Biomedicals; CA). *In vivo* absorption spectra were measured with an SLM-Aminco™ DW-  
128 2000 spectrophotometer (Olis; GA) using optically thin cell suspensions. These values  
129 were normalized to Chl *a* and used to calculate the optical absorption cross-sections,  
130 referred to as  $a^*$  (56, 57).

131 PSII biophysical characteristics were measured on a custom-built fluorescence  
132 induction and relaxation instrument (FIRE, Satlantic Inc., Canada; Gorbunov & Falkowski,  
133 2004). The kinetics of the single-turnover saturating flash were analyzed to obtain the  
134 maximum quantum efficiency of photochemistry ( $F_v/F_m$ ) and the functional absorption  
135 cross-section of PSII ( $\sigma_{PSII}$ ).

136 Functional metabolic assignments for identified gene transcripts into 16 relevant  
137 gene categories was done using DiatomCyc ([www.diatomcyc.org](http://www.diatomcyc.org)), JGI Protist for Phatr2  
138 ([genome.jgi.doe.gov/Phatr2](http://genome.jgi.doe.gov/Phatr2)), Ensembl for Phatr3 (<https://protists.ensembl.org/>  
139 [Phaeodactylum \\_tricornutum/Info/Index](http://Phaeodactylum_tricornutum/Info/Index)), and NCBI databases ([www.ncbi.nlm.nih.gov](http://www.ncbi.nlm.nih.gov)).

140 Information regarding the localization of these target genes was predicted *in silico*, based  
141 on gene sequences retrieved from NCBI. HECTAR v1.3 software was used to predict  
142 subcellular targeting for heterokont proteins (webtools.sb-roscoff.fr); TMHMM was used  
143 to predict transmembrane helices in proteins (www.cbs.dtu.dk/services/TMHMM);  
144 SignalP 4.0 Server was used to predict presence and location of signal peptide cleavage  
145 sites (www.cbs.dtu.dk/ services/SignalP); and Target P1.1 Server was used to predict the  
146 subcellular location of eukaryotic proteins (www.cbs.dtu.dk /services/TargetP).

147 Identification of putative diatom lncRNAs candidates was based on Coding  
148 Potential Calculators, CPC (17) and CPC2 (18) scores and then filtering for transcript  
149 length  $\geq 200$  nt and open reading frames (ORFs)  $< 100$  aa (19).

150 **Plasmid Map S1 : RNA antisense vector**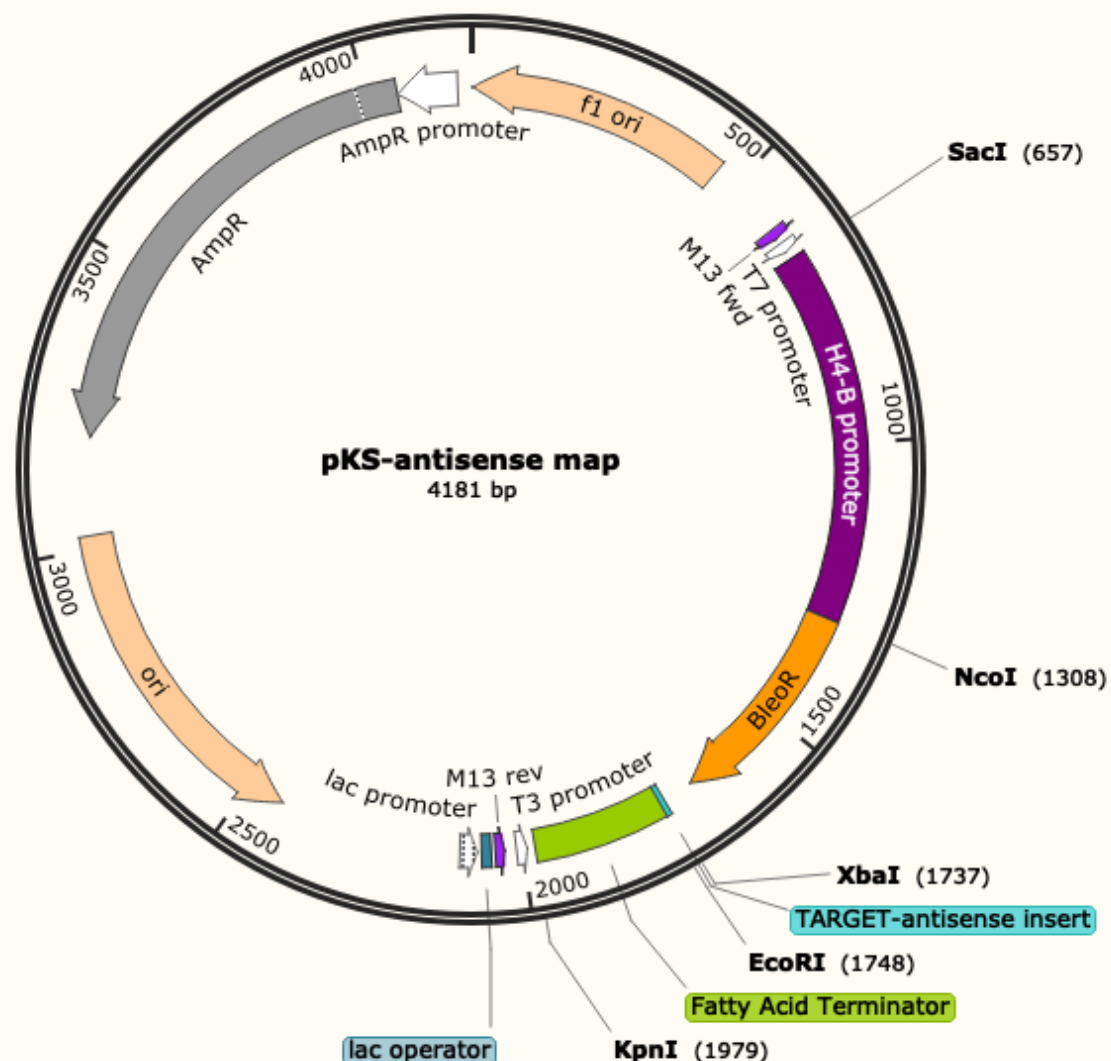

151  
 152 CTAAATTGTAAGCGTTAATATTTTTGTTAAAATTCGCGTTAAATTTTTGTTAAATCAGCTCA  
 153 TTTTTTAACCAATAGGCCGAAATCGGCAAATCCCTTATAAATCAAAGAATAGACCGA  
 154 GATAGGGTTGAGTGTTGTTCCAGTTTGAACAAGAGTCCACTATTAAGAACGTGGACT  
 155 CCAACGTCAAAGGGCGAAAAACCGTCTATCAGGGCGATGGCCACTACGTGAACCATCA  
 156 CCCTAATCAAGTTTTTTGGGGTCGAGGTGCCGTAAGCACTAAATCGGAACCCTAAAGG  
 157 GAGCCCCGATTTAGAGCTTGACGGGGAAAGCCGGCGAACGTGGCGAGAAAGGAAGGG  
 158 AAGAAAGCGAAAGGAGCGGGCGCTAGGGCGCTGGCAAGTGTAGCGGTCACGCTGCGCG  
 159 TAACCACCACACCCGCCGCGCTTAATGCGCCGCTACAGGGCGCGTCCCATTGCGCCATTCA  
 160 GGCTGCGCAACTGTTGGGAAGGGCGATCGGTGCGGGCCTCTTCGCTATTACGCCAGCTG  
 161 GCGAAAGGGGGATGTGCTGCAAGGCGATTAAGTTGGGTAACGCCAGGGTTTTCCAGTC  
 162 ACGACGTTGTA AACGACGGCCAGTGAGCGCGCGTAATACGACTCACTATAGGGCGAAT  
 163 TGGAGCTCGCATCTCACGCACCAGGCGCTGGAAGGGCAACTTGCGGATGAGAAGGTCCG  
 164 TGGACTTCTGGTAACGACGGATCTCACGCAGAGCGACGGTTCCAGGGCGATAACGGTGG  
 165 GGCTTCTTGACTCCTCCGGTAGCCGGAGCGGACTTGCGGGCAGCCTTGGTGGCAAGCTG  
 166 CTTGCGCGGCGCTTTGCCTCCGGTGGATTTACGGGCGGTTTGCTTGGTTTCGGGCCATTTT  
 167 GACGGTTTTTTTTTACAAGAGAAGAGTTCTTCAAATTTGTGAGGTTAAAGTGTGTGGCTT  
 168 CCGCCGTAGTCAAGGAGCGTGCAGTTGCCGATCGCACCGGTACGTTCTGTAGAAATGAA  
 169 CACAGTGTGTTGAATTGAAAGTATGGCGCAGGTATGGTGTGTGATAAGTAGCAGCCGCG  
 170 CCGAGACAAACAACTTTGGTTTCTACGACAATCTCTGTAGACAAGTACTAGAAACCCG

171 TTTGAACGAGCATAAATCTGCACCGGCAGGCCACCAGACATCGTTTCAACGTAATATTCT  
172 ACGTAACCATTTTATCCCAGGAAACCTACGGCCTGTGAACCATGAAAGGAAGCACTCAC  
173 AATTCGCTCTCGGCAACAACCGACAATAGTCTTACTCACAGTCAATACCGAAAACAAAC  
174 AACAGCCATGGCCAAGTTGACCAGTGCCGTTCCGGTGCTCACCGCGCGGACGTCGCCG  
175 GAGCGGTGAGTTCTGGACCGACCGGCTCGGGTTCTCCCGGACTTCGTGGAGGACGAC  
176 TTCGCCGGTGTGGTCCGGGACGACGTGACCCTGTTTCATCAGCGCGGTCCAGGACCAGGT  
177 GGTGCCGGACAACACCCTGGCCTGGGTGTGGGTGCGCGGCCTGGACGAGCTGTACGCCG  
178 AGTGGTCCGAGGTTCGTGTCCACGAACTTCCGGGACGCCTCCGGGCCGGCCATGACCAGG  
179 ATCGGCGAGCAGCCGTGGGGGCGGGAGTTTCGCCCTGCGCGACCCGGCCGGCAACTGCGT  
180 GCACTTCGTGGCCGAGGAGCAGGACTGACCAGCGCCGACCAACACCGCCGGTCCGACGC  
181 GGCCCGACGGGTCCGAGGCCTTCTAGA(TARGET)GAATTCTGAGCTACCTCGACTTTGGC  
182 TGGGACACTTTCAGTGAGGACAAGAAGCTTCAGAAGCGTGCTATCGAACTCAACCAGGG  
183 ACGTGCGGCACAAATGGGCATCCTTGCTCTCATGGTGCACGAACAGTTGGGAGTCTCTA  
184 TCCTTCCTAAAAATTTAATTTTCATTAGTTGCAGTCACTCCGCTTTGGTTTACAGTCA  
185 GAATAACACTAGCTCGTCTTCAGTACCCAGCTTTTGTTCCTTTAGTGAGGGTTAATTG  
186 CGCGCTTGGCGTAATCATGGTATAGTCTGTTTCTGTGTGAAATTGTTATCCGCTCACA  
187 TTCCACACAACATACGAGCCGGAAGCATAAAGTGTAAGCCTGGGGTGCCTAATGAGTG  
188 AGCTAACTCACATTAATTGCGTTGCGCTCACTGCCCGCTTTCAGTCGGGAAACCTGTCC  
189 TGCCAGCTGCATTAATGAATCGGCCAACGCGCGGGGAGAGGCGTTTTGCGTATTGGGCG  
190 CTCTTCGCTTCTCGCTCACTGACTCGCTGCGCTCGGTTCGTTTCGCTGCGGCGAGCGGT  
191 ATCAGTCACTCAAAGGCGGTAATACGGTTATCCACAGAATCAGGGGATAACGCAGGAA  
192 AGAACATGTGAGCAAAAAGGCCAGCAAAAAGGCCAGGAACCGTAAAAAGGCCGCGTTGCT  
193 GCGTTTTTCCATAGGCTCCGCCCCCTGACGAGCATCACAAAAATCGACGCTCAAGTC  
194 AGAGGTGGCGAAACCCGACAGGACTATAAAGATACCAGGCGTTTCCCCCTGGAAGCTCC  
195 CTCGTGCGCTCTCCTGTTCCGACCCTGCCGCTTACCGGATACCTGTCCGCCTTCTCCCTT  
196 CGGGAAGCGTGGCGCTTCTCATAGCTCACGCTGTAGGTATCTCAGTTCGGTGTAGGTGC  
197 TTCGCTCCAAGCTGGGCTGTGTGCACGAACCCCCGTTACGCCGACCGCTGCGCCTTAT  
198 CCGGTAACATCGTCTTGAGTCCAACCCGGTAAGACACGACTTATCGCCACTGGCAGCA  
199 GCCACTGGTAACAGGATTAGCAGAGCGAGGTATGTAGGCGGTGCTACAGAGTTCTTGAA  
200 GTGGTGGCCTAACTACGGCTACACTAGAAGGACAGTATTTGGTATCTGCGCTCTGCTGA  
201 AGCCAGTTACCTTCGGAAAAAGAGTTGGTAGCTCTTGATCCGGCAAAACAAACCACCGCT  
202 GGTAGCGGTGGTTTTTTTTGTTTGAAGCAGCAGATTACGCGCAGAAAAAAGGATCTCA  
203 AGAAGATCCTTTGATCTTTTTCTACGGGGTCTGACGCTCAGTGGAACGAAAACCTCACGTTA  
204 AGGGATTTTGGTCATGAGATTATCAAAAAGGATCTTACCTAGATCCTTTTTAAATTA  
205 ATGAAGTTTTAAATCAATCTAAAGTATATATGAGTAAACTTGGTCTGACAGTTACCAATG  
206 CTTAATCAGTGAGGCACCTATCTCAGCGATCTGTCTATTTTCGTTTCATCCATAGTTGCTG  
207 ACTCCCGTCTGTAGATAACTACGATACGGGAGGGCTTACCATCTGGCCCCAGTGCTG  
208 CAATGATACCGCGAGACCCACGCTCACCGGCTCCAGATTTATCAGCAATAAACCAGCCA  
209 GCCGGAAGGGCCGAGCGCAGAAGTGGTCTGCAACTTTATCCGCCTCCATCCAGTCTAT  
210 TAATTGTTGCCGGGAAGCTAGAGTAAGTGTAGTTCGCCAGTTAATAGTTTGCGCAACGTTGT  
211 TGCCATTGCTACAGGCATCGTGGTGTACGCTCGTCGTTTGGTATGGCTTCATTCAGCTC  
212 CGGTTCCCAACGATCAAGGCGAGTTACATGATCCCCCATGTTGTGCAAAAAAGCGGTTA  
213 GCTCCTTCGGTCTCCGATCGTTGTGAGAAGTAAGTTGGCCGACGTTATCACTCATGG  
214 TTATGGCAGCACTGCATAATTCTCTTACTGTCATGCCATCCGTAAGATGCTTTTCTGTGAC  
215 TGGTGAGTACTCAACCAAGTCATTCTGAGAATAGTGTATGCGGCGACCGAGTTGCTCTTG  
216 CCCGGCGTCAATACGGGATAATACCGCGCCACATAGCAGAACTTTAAAAGTGCTCATCA  
217 TTGGAAAACGTTCTTCGGGGCGAAAACCTCTCAAGGATCTTACCGCTGTTGAGATCCAGTT  
218 CGATGTAACCCACTCGTGCACCCAACTGATCTTACGATCTTTTACTTTACCAGCGTTTC  
219 TGGGTGAGCAAAAACAGGAAGGCAAAATGCCGCAAAAAAGGGAATAAGGGCGACACG  
220 GAAATGTTGAATACTCATACTTCTCTTTTCAATATTATTGAAGCATTTATCAGGGTTAT  
221 TGTCTCATGAGCGGATACATATTTGAATGTATTTAGAAAAATAAACAATAGGGGTTCC  
222 GCGCACATTTCCCCGAAAAGTGCCAC  
223  
224

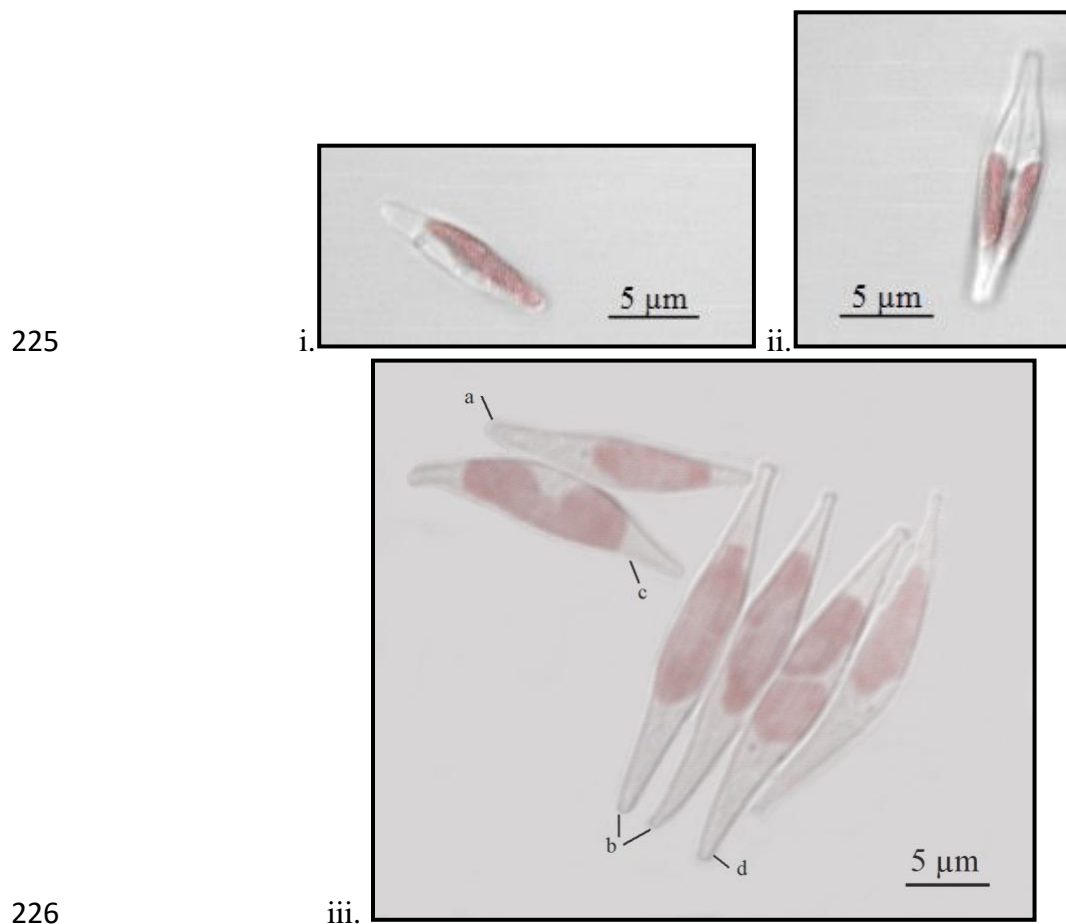

**Figure S1:**

Confocal laser microscopy images of low light acclimated Wild Type (WT) *P.tricorutum* and the PTP-33 transformant strain. Plastids (pink) showing various stages of growth and division.

(i.) LL ( $20 \mu\text{mol photons m}^{-2}\text{s}^{-1}$ ) acclimated WT having a single plastid.

(ii.) WT cell acclimated to LL, undergoing mitosis. The visible septum and the two separated plastids observed are a result of this cell division, one for each daughter cell.

(iii.) PTP-33 transformants acclimated to LL. Normal or WT-like plastid in cell 'a'; abnormally large plastids in cells 'b'; a plastid undergoing fission within the cell 'c' and cell 'd' with two plastid organelles.



237

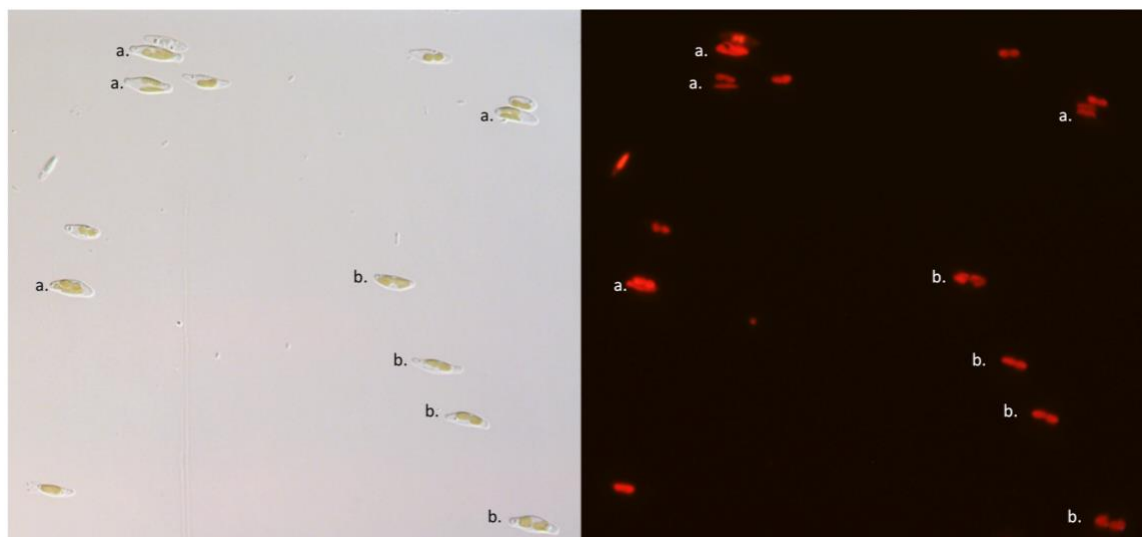

238

239 **Figure S2** – Fluorescent microscopic images of transformant line PTP-33 acclimated to low light  
240 growth conditions

241

242 600x magnification microscopic image of late exponential phase PTP-33 transformant acclimated  
243 to low light (LL) intensity of  $20 \mu\text{mol photons m}^{-2}\text{s}^{-1}$ . Brightfield image (left) and fluorescent  
244 image capturing chlorophyll autofluorescence (right) clearly show cells that appear to have two  
245 plastids per cell. The plastids of cells in the process of mitosis cleave along the same axis as the  
246 cell, i.e., a meridional plane (a.). Plastid division independent of mitosis, however, divide  
247 perpendicular, along an equatorial plane (b.).

248

249

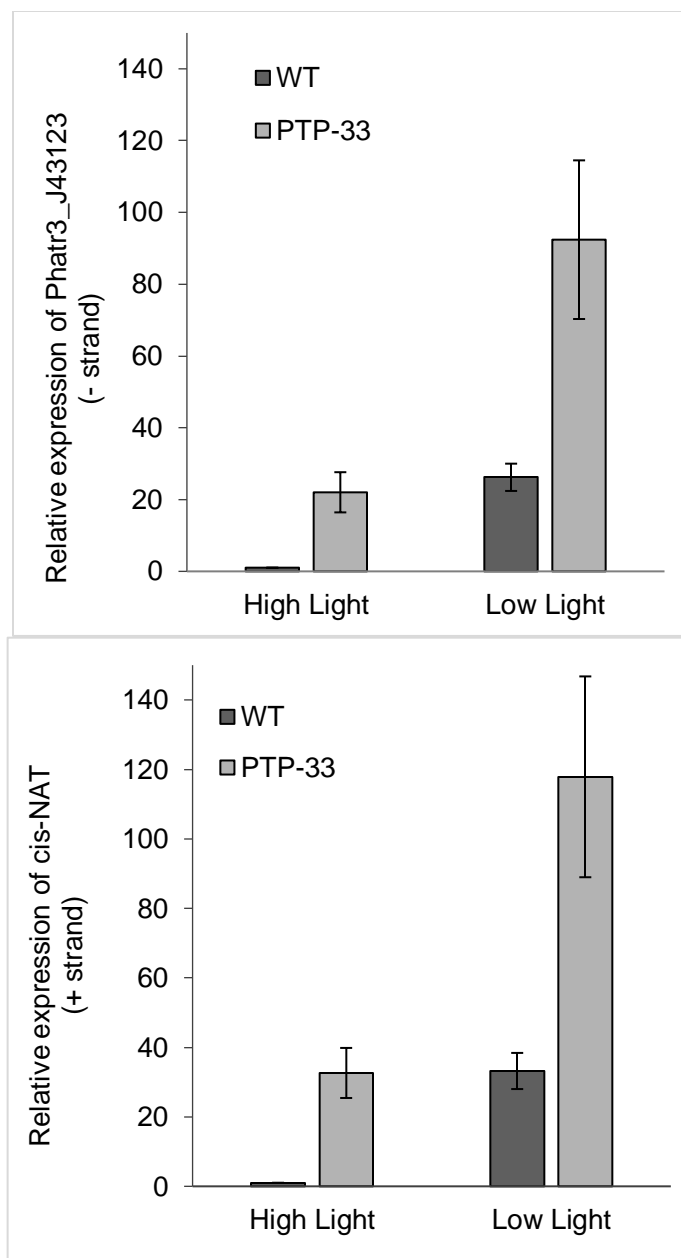

250

251

252

**Figure S3:**

253 Relative expression levels (RT-qPCR) of mRNA Phatr3\_J43123 and its cognate Natural Anti-

254 sense Transcript (*cis*-NAT) from the opposite strand, normalized to wild-type levels under high255 light (n = 3; Error bars represent  $\pm$  SD). For *cis*-NAT p(WT/PTP-33 in HL) = 0.035; p(WT/PTP-

256 33 in LL) = 0.029; p(LL/HL of WT) = 0.019. For Phatr3\_J43123 p(WT/PTP-33 in HL) = 0.037;

257 p(WT/PTP-33 in LL) = 0.007; p(LL/HL of WT) = 0.036.

258

| <i>Phatr2</i> | <i>Phatr3</i> | <i>LL/HL<br/>log2 fold<br/>change</i> | <i>LL/HL<br/>fold<br/>change</i> | <i>p-adj (FDR)</i> | <i>Gene name / description</i>       |
|---------------|---------------|---------------------------------------|----------------------------------|--------------------|--------------------------------------|
| 22680         | 22680         | -                                     | -                                | -                  | LHCF13 - fucoxanthin chl a/c protein |
| 27278         | 27278         | 5                                     | 32.1                             | 4.35E-121          | LHCX1 - fucoxanthin chl a/c protein  |
| 48882         | 48882         | 4                                     | 21.1                             | 6.10E-169          | LHCF15 - fucoxanthin chl a/c protein |
| 30648         | 30648         | 4                                     | 19.7                             | 5.99E-68           | LHCF5 - fucoxanthin chl a/c protein  |
| 22395         | 22395         | 2                                     | 3.2                              | 5.12E-12           | LHCF8 - fucoxanthin chl a/c protein  |
| 50725         | 9799          | 2                                     | 2.9                              | 4.20E-12           | LHCR3 - fucoxanthin chl a/c protein  |
| 47485         | 13877         | 1                                     | 2.7                              | 8.54E-12           | LHC13877 - fucox - chl a/c protein   |
| 48798         | EG00416       | 1                                     | 2.7                              | 6.15E-12           | LHCdeviant - fucox - chl a/c protein |
| 54027         | 54027         | 1                                     | 2.6                              | 3.40E-12           | LHCR12 - fucoxanthin chl a/c protein |
| 25893         | 25893         | 1                                     | 2.5                              | 1.16E-13           | LHCF14 - fucoxanthin chl a/c protein |
| 44601         | 11006         | 1                                     | 2.4                              | 1.90E-11           | LHCR1 - fucoxanthin chl a/c protein  |
| 17531         | 17531         | 1                                     | 2.4                              | 4.94E-08           | LHC17531 - fucox - chl a/c protein   |
| 25172         | 25172         | 1                                     | 2.3                              | n/a                | LHCF2 - fucoxanthin chl a/c protein  |
| 38720         | 38720         | 1                                     | 2.2                              | 1.58E-06           | LHCX4 - fucoxanthin chl a/c protein  |
| 22006         | 22006         | 1                                     | 2.1                              | 2.19E-12           | LHCF10 - fucoxanthin chl a/c protein |
| 34536         | 34536         | 1                                     | 2.0                              | 3.60E-03           | LHCF16 - fucoxanthin chl a/c protein |
| 30643         | 29266         | 1                                     | 2.0                              | 5.33E-07           | LHCF7 - fucoxanthin chl a/c protein  |
| 23257         | 23257         | 1                                     | 2.0                              | 4.12E-05           | LHCR11 - fucoxanthin chl a/c protein |
| 30031         | EG00427       | 1                                     | 2.0                              | 1.02E-05           | LHCF9 - fucoxanthin chl a/c protein  |
| 29266         | 29266         | 1                                     | 2.0                              | 3.53E-07           | LHCF6 - fucoxanthin chl a/c protein  |
| 17766         | 17766         | 1                                     | 1.9                              | n/a                | LHCR4 - fucoxanthin chl a/c protein  |
| 18049         | 18049         | 1                                     | 1.9                              | 2.18E-05           | LHCF1 - fucoxanthin chl a/c protein  |
| 47813         | 14386         | 1                                     | 1.9                              | 3.60E-04           | LHCR14 - fucoxanthin chl a/c protein |
| 43522         | 18180         | 1                                     | 1.8                              | 4.51E-04           | LHCR7 - fucoxanthin chl a/c protein  |
| 22956         | 22956         | 1                                     | 1.8                              | 1.52E-05           | LHCR2 - fucoxanthin chl a/c protein  |
| 6062          | 6062          | 1                                     | 1.8                              | 2.97E-06           | LHC6062 – fucox - chl a/c protein,   |
| 43860         | 10243         | 1                                     | 1.5                              | 1.84E-02           | LHCR9 - fucoxanthin chl a/c protein  |
| 51230         | 51230         | 1                                     | 1.5                              | 6.95E-03           | LHCF11 - fucoxanthin chl a/c protein |
| 16302         | 16302         | 1                                     | 1.5                              | 7.96E-02           | LHCF12 - fucoxanthin chl a/c protein |
| 14986         | 14986         | 0                                     | 1.3                              | 3.02E-01           | LHCR5 - fucoxanthin chl a/c protein  |
| 25168         | 25168         | 0                                     | 1.1                              | 5.60E-01           | LHCF4 - fucoxanthin chl a/c protein  |
| 44733         | 44733         | 0                                     | -0.9                             | 5.50E-01           | LHCX3 - fucoxanthin chl a/c protein  |
| 15820         | EG02552       | 0                                     | -1.0                             | 9.83E-01           | LHC15820 - fucoxanthin chl protein   |
| 50705         | 50705         | 0                                     | -1.0                             | 9.04E-01           | LHCF3 - fucoxanthin chl a/c protein  |
| 56319         | 14242         | 0                                     | -1.2                             | 4.43E-01           | LHCR6 - fucoxanthin chl a/c protein  |
| 24119         | 24119         | 0                                     | -1.4                             | 1.79E-01           | LHC24119 – fucox - chl a/c protein   |
| 56310         | EG02221       | -1                                    | -1.6                             | 8.26E-03           | LHCF17 - fucoxanthin chl a/c protein |
| -             | EG02404       | -1                                    | -2.2                             | 5.63E-05           | LHCX2 - fucoxanthin chl a/c protein  |
| 42519         | 42519         | -1                                    | -2.3                             | 1.24E-06           | LHC related                          |
| 32294         | 32294         | -2                                    | -3.7                             | 1.56E-13           | LHCR8 - fucoxanthin chl a/c protein  |
| 50086         | 16481         | -2                                    | -4.7                             | 2.96E-29           | LHCR10 - fucoxanthin chl a/c protein |

259

260

**Table S1:**

261 Differential expression heat map of Light Harvesting Complex (LHC) genes observed in *P.tricornutum*  
 262 grown in low light [LL - 20  $\mu\text{mol photons m}^{-2}\text{s}^{-1}$ ] as compared to high light [HL - 940  $\mu\text{mol photons m}^{-2}\text{s}^{-1}$ ]. (n=3; p-adj (FDR) < 0.05)

263

264

265

| <i>Phatr2</i>                                        | <i>Phatr3</i> | <i>LL/HL log2 fold change</i> | <i>LL/HL fold change</i> | <i>Gene name / description</i>               |
|------------------------------------------------------|---------------|-------------------------------|--------------------------|----------------------------------------------|
| Nuclear Photosynthetic Electron Transport Components |               |                               |                          |                                              |
| 26293                                                | 26293         | 1.35                          | 2.6                      | PSBU PSII OEC extrinsic subunit              |
| 13895                                                | 13895         | 1.35                          | 2.5                      | HCF136 PSII assembly & repair                |
| 9078                                                 | 9078          | 1.20                          | 2.3                      | PSB27 PSII assembly & repair                 |
| 44056                                                | 44056         | 1.11                          | 2.2                      | PETJ Cytochrome c6, cytochrome c553          |
| 54499                                                | 54499         | 1.03                          | 2.0                      | PSBQOEE3 Oxygen-evolving enhancer protein 3  |
| 20331                                                | 20331         | 1.02                          | 2.0                      | PSBO Oxygen-evolving enhancer protein 1      |
| Photoreceptors                                       |               |                               |                          |                                              |
| 8113                                                 | 8113          | 2.49                          | 5.6                      | AUREO1a /Pt aureochrome1                     |
| 15468                                                | 15468         | 2.11                          | 4.3                      | AUREO2/ Pt aureochrome 4                     |
| 54342                                                | 54342         | 1.73                          | 3.3                      | CryP Cryptochrome -plant like                |
| 27429                                                | 27429         | 1.72                          | 3.3                      | CPF1 Cryptochrome photolyase family 1        |
| 54330                                                | 54330         | 0.24                          | 1.2                      | DPH Diatom Phytochrome I                     |
| 55037                                                | 55037         | 0.30                          | 1.2                      | SKP3 Sensor kinase protein 3                 |
| 34592                                                | 34592         | -0.93                         | -1.9                     | CPF2 Cry-dash cryptochrome/photolyase family |

266

267 **Table S2:**

268 Differential expression heat map of Nuclear photosynthetic electron transport components and  
 269 Photoreceptor genes, as observed in *P.tricornutum* grown in low light [LL - 20  $\mu\text{mol photons m}^{-2}\text{s}^{-1}$ ] as  
 270 compared to high light [HL - 940  $\mu\text{mol photons m}^{-2}\text{s}^{-1}$ ]. (n=3)

271

| <i>Conditions</i>                       | <i>Phatr3_J50052<br/>differential expression<br/>(log2 fold)</i> | <i>Citation</i>             |
|-----------------------------------------|------------------------------------------------------------------|-----------------------------|
| +/- Silica                              | absent                                                           | Sapriel et al. 2009         |
| +/- Cadmium                             | absent                                                           | Brembu et al. 2011          |
| +/- Nitrate                             | absent                                                           | Remmers et al. 2018         |
| WT -Nitrate/+Nitrate                    | +0.33                                                            | Levitan et al. 2015         |
| - Nitrate (after 4 hrs)                 | +0.47                                                            | Matthijs et al. 2016        |
| - Nitrate (after 8 hrs)                 | +0.24                                                            |                             |
| - Nitrate (after 20 hrs)                | +0.03                                                            |                             |
| - Phosphate (after 36 hrs)              | -0.95                                                            | Matthijs et al. 2017        |
| Cell cycle (79%G1 20%S) vs.<br>(100%G1) | -1.08                                                            | Kim et al. 2017             |
| 10 umol Blue Light (1 hr<br>exposure)   | -0.83                                                            | König et al. 2017           |
| Redox sensitive peptide<br>fragments    | absent                                                           | Rossenwasser et al.<br>2014 |
| Iron limitation                         | absent                                                           | Smith et al. 2016           |

272

273 **Table S3** – Presence of Phatr3\_J50052 (LSK) in transcriptome studies of *P. tricornutum* grown  
 274 under various environmental conditions

275

276

|     | Primer Name                                                   | Nucleotide Sequence                                                    |
|-----|---------------------------------------------------------------|------------------------------------------------------------------------|
| 1.  | Phatr3_EG01529 Gibson - Forward                               | 5' - CGG GTC CGA GGC CTT CTA GAT AGA TAG<br>TTC CAC AGA ACT ATT C - 3' |
| 2.  | Phatr3_EG01529 Gibson - Reverse                               | 5' - GTC GAG GTA GCT CAG AAT TCA GCG AAC<br>TAA AAC CAT GAC - 3'       |
| 3.  | Phatr3_J47715 Gibson - Forward                                | 5' - CGG GTC CGA GGC CTT CTA GAC TCT CTT<br>GAC AGC CTT CAC - 3'       |
| 4.  | Phatr3_J47715 Gibson - Reverse                                | 5' - GTC GAG GTA GCT CAG AAT TCA TGA CCA<br>AAA CGA ACA GAA C - 3'     |
| 5.  | Phatr3_J43123 Gibson - Forward                                | 5' - CGG GTC CGA GGC CTT CTA GAC ACA GGA<br>CTC TTA CGC TC - 3'        |
| 6.  | Phatr3_J43123 Gibson - Reverse                                | 5' - GTC GAG GTA GCT CAG AAT TCA TGC AGC<br>TTT ACC TTG TG - 3'        |
| 7.  | Phatr3_EG00707 Gibson - Forward                               | 5' - CGG GTC CGA GGC CTT CTA GAT TAC TCT<br>GAC TTG GTT GGT TC - 3'    |
| 8.  | Phatr3_EG00707 Gibson - Reverse                               | 5' - GTC GAG GTA GCT CAG AAT TCA TGT CGA<br>CCC GCT CTT TC - 3'        |
| 9.  | Phatr3_J37655 Gibson - Forward                                | 5' - CGG GTC CGA GGC CTT CTA GAA TCC GTA<br>CTT TCC AAC CC - 3'        |
| 10. | Phatr3_J37655 Gibson - Reverse                                | 5' - GTC GAG GTA GCT CAG AAT TCA CGA GAC<br>CCG TCA ACA AC - 3'        |
| 11. | Phatr3_J50052 Gibson - Forward                                | 5' - CGG GTC CGA GGC CTT CTA GAC TCT TGT<br>CCA GTC GTT CC - 3'        |
| 12. | Phatr3_J50052 Gibson - Reverse                                | 5' - GTC GAG GTA GCT CAG AAT TCG TAC AAG<br>GCC ACA CTG AAA TC - 3'    |
| 13. | qPCR Phatr3_J43123 - Forward<br>(Used for ssqPCR as well)     | 5' - GCC CGC TAT GCC AAT GC - 3'                                       |
| 14. | qPCR Phatr3_J43123 - Reverse                                  | 5' - CGC TTG ATT GGC GGA AAA T - 3'                                    |
| 15. | qPCR Phatr3_J50052_Exon1 - Forward                            | 5' - TCC ACC ACC GCC CAT TC - 3'                                       |
| 16. | qPCR Phatr3_J50052_Exon1 - Reverse                            | 5' - TGT AAG ATC CGG TCG ATT CCA - 3'                                  |
| 17. | qPCR Phatr3_J50052_Exon2 - Forward                            | 5' - CGA CTG GAC AAG AGC GAA AAG - 3'                                  |
| 18. | qPCR Phatr3_J50052_Exon2 - Reverse                            | 5' - AAT ACG TGT TCA TGG CAA TGC T - 3'                                |
| 19. | qPCR Phatr3_J10847_RPS - Forward                              | 5' - CGA AGT CAA CCA GGA AAC CAA - 3'                                  |
| 20. | qPCR Phatr3_J10847_RPS - Reverse<br>(used for ssqPCR as well) | 5' - GTG CAA GAG ACC GGA CAT ACC - 3'                                  |

277

278 **Table S4** – Primer sequences related to inserting antisense constructs into pKS plasmid using  
 279 Gibson Assembly and RT-qPCR
